# Supplementary material
Source: PubMed Central journal article supplement (PMC7263227)
Supplement: mmc1.pdf [file mmc1.pdf]

## Supplemental Information

### **During *Aspergillus* Infection, Monocyte-Derived DCs, Neutrophils, and Plasmacytoid DCs Enhance Innate Immune Defense through CXCR3-Dependent Crosstalk**

**Yahui Guo, Shinji Kasahara, Anupam Jhingran, Nicholas L. Tosini, Bing Zhai, Mariano A. Aufiero, Kathleen A.M. Mills, Mergim Gjonbalaj, Vanessa Espinosa, Amariliz Rivera, Andrew D. Luster, and Tobias M. Hohl**

## SUPPLEMENTAL INFORMATION

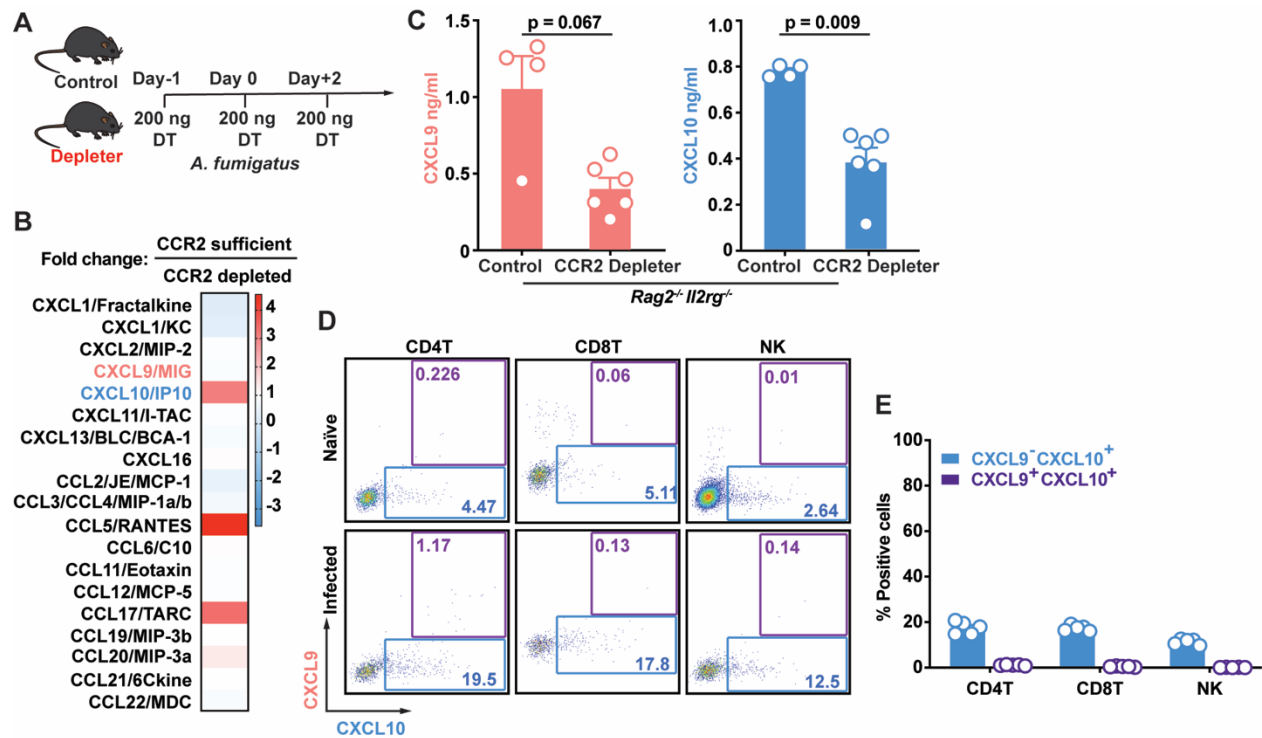

**Figure S1. CCR2<sup>+</sup> myeloid cells regulate CXCL9 and CXCL10 production during *A. fumigatus* infection. Related to Figure 1.**

(A) Experimental Scheme: Diphtheria toxin (DT) was administered intraperitoneally (i.p.) as indicated to ablate DTR<sup>+</sup> cells in mouse strains that express the CCR2-DTR transgene (Depleter) or non-transgenic littermates that not do express the CCR2-DTR transgene (Control).

(B) Fold change in lung chemokine levels in CCR2-sufficient (CCR2-DTR<sup>-/-</sup> Rag2<sup>-/-</sup> Il2rg<sup>-/-</sup>) versus CCR2-depleted (CCR2-DTR<sup>+/-</sup> Rag2<sup>-/-</sup> Il2rg<sup>-/-</sup>) mice that lack lymphoid lineage cells 36 h pi with  $3 \times 10^7$  CEA10 conidia, as measured by proteome profiler array (n = 2 per group, data pooled from 2 experiments).

(C) Lung CXCL9 and CXCL10 levels in CCR2-DTR<sup>+/-</sup> Rag2<sup>-/-</sup> Il2rg<sup>-/-</sup> and littermates (CCR2-DTR<sup>-/-</sup> Rag2<sup>-/-</sup> Il2rg<sup>-/-</sup>) (n = 4-6 per group) at 48 h pi with  $3 \times 10^7$  CEA10 conidia.

(D) Representative plots of RFP (CXCL9) and BFP (CXCL10) expression in indicated lung leukocytes isolated from Rex3 Tg → C57BL6.SJL BM chimeric mice at baseline (naïve, top row) and 48 h pi with  $3 \times 10^7$  CEA10 conidia (infected, bottom row). The blue and purple gates indicate the frequency of BFP<sup>+</sup> (CXCL9<sup>+</sup>) and BFP<sup>+</sup>RFP<sup>+</sup> (CXCL9<sup>+</sup> CXCL10<sup>+</sup>) cells, respectively.

(E) The graphs indicate the frequency of CXCL9<sup>-</sup> CXCL10<sup>+</sup> and CXCL9<sup>+</sup> CXCL10<sup>+</sup> CD4<sup>+</sup> T cells, CD8<sup>+</sup> T cells and NK cells at 48 h pi.

(C, E) Data are representative of two independent experiments. Dots represent individual mice and data are presented as mean  $\pm$  SEM, (C) Statistical analysis: Mann-Whitney test.

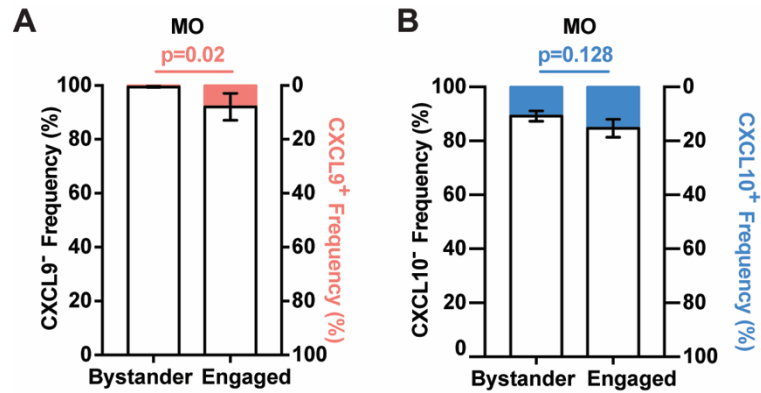

**Figure S2. Monocyte CXCL9 and CXCL10 expression during *A. fumigatus* infection.**

**Related to Figure 2.**

(A) Proportion of RFP<sup>+</sup> (CXCL9<sup>+</sup>; pink bar) and RFP<sup>-</sup> (CXCL9<sup>-</sup>; white bar); and (B) BFP<sup>+</sup> (CXCL10<sup>+</sup>; blue bar) and BFP<sup>-</sup> (CXCL10<sup>-</sup>; white bar) expression in indicated bystander and fungus-engaged leukocytes isolated infected Rex3 Tg → C57BL6.SJL BM chimeric mice (n=7) with  $3 \times 10^7$  AF633-labeled CEA10 conidia.

(A and B) Data are presented as mean ± SEM. Statistical analysis: Mann-Whitney test.

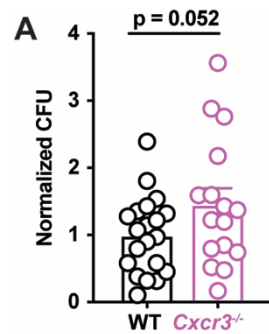

**Figure S3. CXCR3 is critical for anti-*Aspergillus* defense. Related to Figure 3.**

(A) Normalized Lung CFUs in C57BL6 (WT) and *Cxcr3*<sup>-/-</sup> mice 72 h pi with  $3 \times 10^7$  CEA10 conidia. Dots represent individual mice and data were pooled from 2 independent experiments.

Data are presented as mean  $\pm$  SEM. Statistical analysis: Mann-Whitney test.

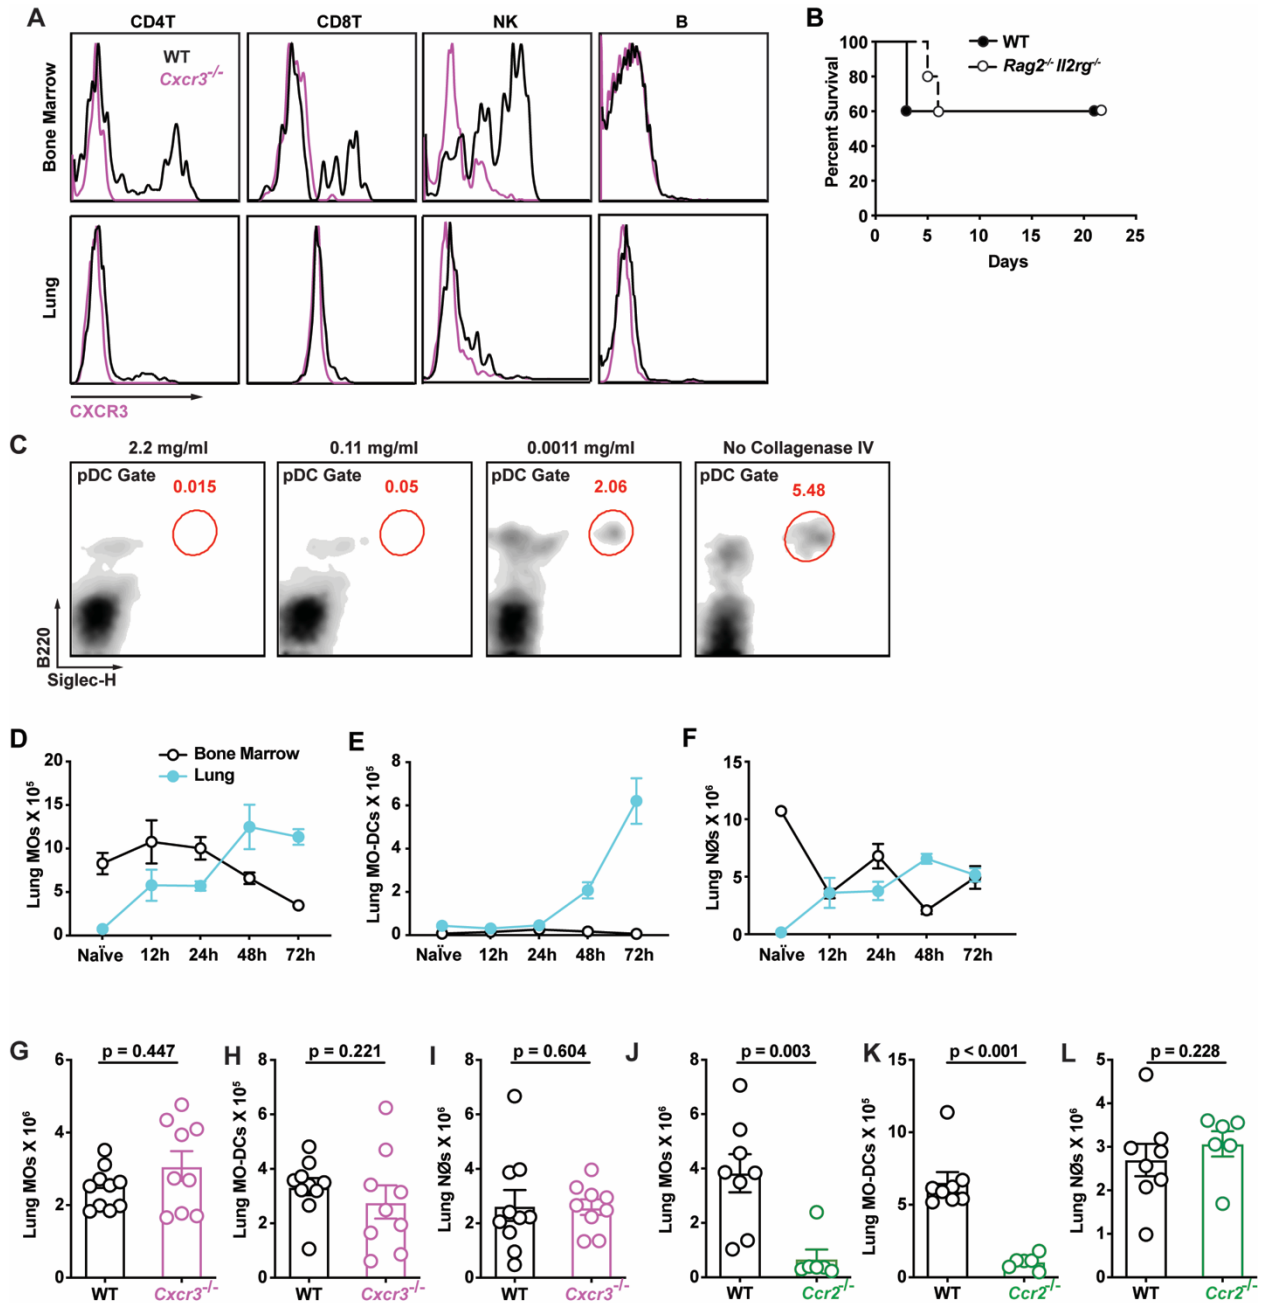

**Figure S4. CXCR3 expression on lung leukocytes and pDC identification in lung digests.**

**Related to Figure 4.**

(A) Representative CXCR3 surface expression in the indicated bone marrow (top row) and lung (bottom row) leukocytes that were isolated from C57BL6 (WT, black lines; *Cxcr3*<sup>+/+</sup>) or *Cxcr3*<sup>-/-</sup> mice (purple lines).

(B) Kaplan-Meier survival of C57BL6 (n = 5 per group) and *Rag2<sup>-/-</sup>Il2rg<sup>-/-</sup>* (n = 5 per group) mice challenged with  $4-8 \times 10^7$  CEA10 conidia.

(C) Representative flow cytometry plots of B220<sup>+</sup>Siglec-H<sup>+</sup> lung pDCs with the indicated concentration of type IV collagenase included in lung preparations to obtain single cells for flow cytometric analysis.

(D-F) Lung (blue filled dots) and bone marrow (open black dots) (D) monocyte, (E) Mo-DC, and (F) neutrophil numbers at baseline and indicated times pi with  $3 \times 10^7$  CEA10 conidia (n = 5 per group).

(G-H) Lung (G) monocyte, (H) Mo-DC, and (I) neutrophil numbers in C57BL6 (WT; open black dots) and *Cxcr3<sup>-/-</sup>* mice (open purple dots) at 72 h pi (n = 10 per group).

(J-L) Lung (J) monocyte, (K) Mo-DC, and (L) neutrophil numbers in C57BL6 (WT; open black dots) and *Ccr2<sup>-/-</sup>* mice (open green bars) at 72 h pi (n = 10 per group).

(D-L) Data are representative of two independent experiments. Dots represent individual mice and data are presented as mean  $\pm$  SEM. Statistical analysis: Mann-Whitney test.

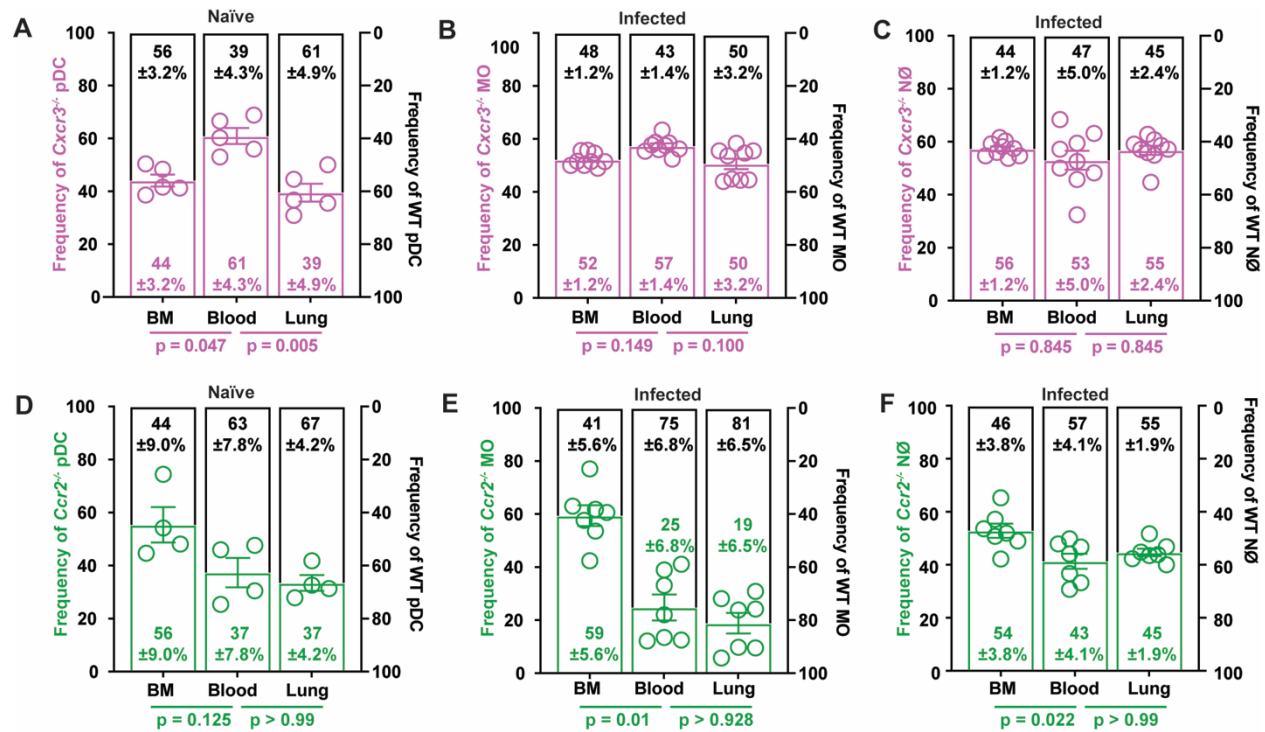

**Figure S5. CXCR3 does not regulate the trafficking of lung monocytes, Mo-DCs, and neutrophils. Related to Figure 5.**

(A) Relative frequencies of *Cxcr3*<sup>-/-</sup> (open purple bars) and *Cxcr3*<sup>+/+</sup> (open black bars) pDCs in the BM, blood, and lung of mixed BM chimeric (1:1 mix of CD45.1<sup>+</sup> *Cxcr3*<sup>+/+</sup> and CD45.2<sup>+</sup> *Cxcr3*<sup>-/-</sup> BM cells → CD45.1<sup>+</sup>CD45.2<sup>+</sup>) mice at baseline.

(B and C) Relative frequencies of *Cxcr3*<sup>-/-</sup> (open purple bars) and *Cxcr3*<sup>+/+</sup> (open black bars) (B) monocytes and (C) neutrophils in the BM, blood, and lung of mixed BM chimeric (1:1 mix of CD45.1<sup>+</sup> *Cxcr3*<sup>+/+</sup> and CD45.2<sup>+</sup> *Cxcr3*<sup>-/-</sup> BM cells → CD45.1<sup>+</sup>CD45.2<sup>+</sup>) mice 72 h pi. (D) Relative frequencies of *Ccr2*<sup>-/-</sup> (open green bars) and *Ccr2*<sup>+/+</sup> (open black bars) pDCs in the BM, blood, and lung of mixed BM chimeric (1:1 mix of CD45.1<sup>+</sup> *Cxcr3*<sup>+/+</sup> and CD45.2<sup>+</sup> *Cxcr3*<sup>-/-</sup> BM cells → CD45.1<sup>+</sup>CD45.2<sup>+</sup>) mice at baseline.

(E-F) Relative frequencies of *Ccr2*<sup>-/-</sup> (open green bars) and *Ccr2*<sup>+/+</sup> (open black bars) (E) monocytes and (F) neutrophils in the BM, blood, and lung of mixed BM chimeric (1:1 mix of CD45.1<sup>+</sup>*Ccr2*<sup>+/+</sup> and CD45.2<sup>+</sup>*Ccr2*<sup>-/-</sup> BM cells → CD45.1<sup>+</sup>CD45.2<sup>+</sup>) mice 72 h pi.

(A-F) Data were pooled from 2 or 3 independent experiments and presented as mean ± SEM, Statistical analysis: Mann-Whitney test.

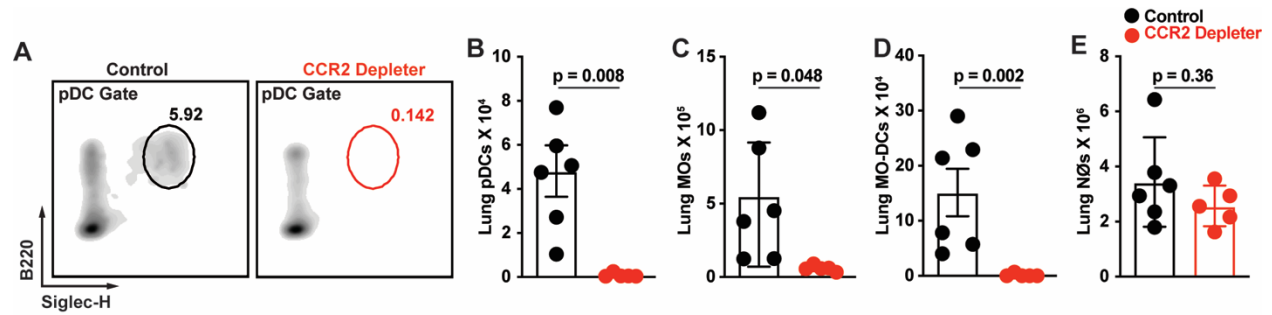

**Figure S6. pDCs are depleted in CCR2 Deleter mice. Related to Figure 6.**

(A) Representative flow cytometry plots of lung B220<sup>+</sup>Siglec-H<sup>+</sup> pDC, (B) lung pDC, (C) lung monocyte, (D) lung Mo-DC, and (E) lung neutrophil numbers in DT-treated CCR2 Deleter mice (CCR2-DTR<sup>+/-</sup>; red symbols) and non-Tg littermate controls (CCR2-DTR<sup>-/-</sup>; black symbols) at 72 h pi with  $3 \times 10^7$  CEA10 conidia.

(B-E) Data were presented as mean  $\pm$  SEM. Statistical analysis: Mann-Whitney test.

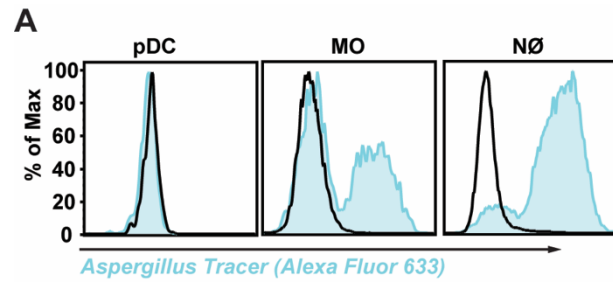

**Figure S7. pDCs do not bind to or engulf *A. fumigatus* conidia. Related to Figure 7.**

(A) AF633 fluorescence intensity in indicated BM leukocytes co-cultured for 24 h with FLARE (blue line) or AF633-unlabeled conidia (MOI = 5).
